# Supplementary material
Source: PubMed Central journal article supplement (PMC3561791)
Supplement: supp_140.3.541_DEV085886.pdf [file supp_140.3.541_DEV085886.pdf]

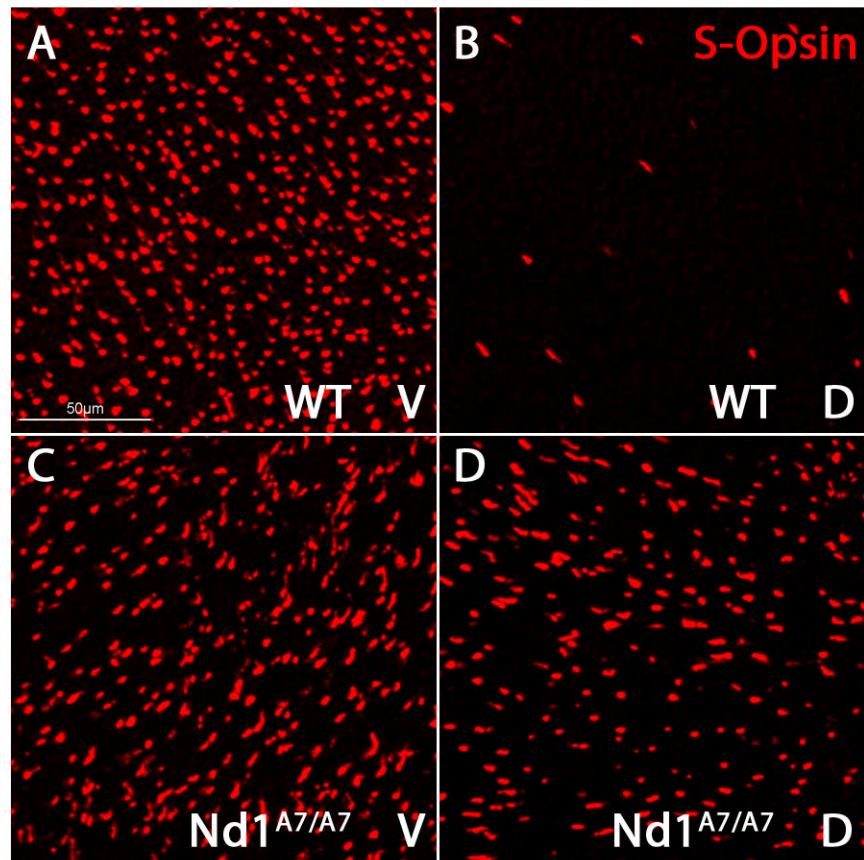

**Fig. S1. *Neurod1*<sup>Atoh7/Atoh7</sup> mice have similar M-cone cell defects as found in *Neurod1*-null retinas.** (A-D) Immunostaining of retinal flatmounts with anti-S-Op sin antibody from P30 (A,B) wild-type and (C,D) *Neurod1*<sup>Atoh7HA/Atoh7HA</sup>. V, ventral retinas; D, dorsal retinas.

A.

Atoh7-binding peak in Nrnx3

>chr12:90280146-90280471 (softmasked)

CAGAGAAGAGTTACTACTGATTCTCCTTGGGATTCTCCTTTTGGAGTCTGGCAGGATCTCTGGGGCAGGGAGAGTCCATAAGGAGAAAAGGATGCTTACAAGC  
TGGGCTCCCCTGAAAAGTGTAGGATGACATGTGCTGGTCCACTGGCC**CAGCTGCCAGATGAT**GGGAACAGGGAT**CAGCTG**TGACCTAATTATGAGTCT  
GGTAAACCTGCACCTGTCTCCTTTCATTTTCCGGCTCATTGACCACCCAGAGGGGAAAATGGATGAGATTCTACTCAAGTCATCCCTGCCACTAC**CATGTG**  
GTCAAGTCCACAGGCCAATGATATTC

B.

|                     |           |                                                     |           |
|---------------------|-----------|-----------------------------------------------------|-----------|
| Mouse Jul. 2007(+)  | 090280146 | CAGAGAAGAGTTACA---CTGATTCTCCTTGGGATTCTCCTTTTGGAGTCT | 090280192 |
| Rat Nov. 2004(+)    | 112599821 | CGGAGAAGAGTTACA--CTGATTCTCCTTGGGATTCTCCTTTGGGCCT    | 112599867 |
| Rhesus Jan. 2006(+) | 141678807 | TAGAAAAGAGTTGC-TTTCTGGGTCCCCTTGGGCCTGCTGCTGCTGGTCCG | 141678855 |
| Horse Jan. 2007(+)  | 023130542 | CAGAGAAGAGTTGCATCGCTGGGCCTCCTTGGGTCTGCTGCTGCTGTTT   | 023130591 |
| Dog May 2005(+)     | 054194720 | CAGATAAAAGTTGCATTGCTGGGTCTCC-TGGGGCGGCTGCTGCTTTTCT  | 054194768 |
| Chicken May 2006(+) | 042108194 | CAGA-----                                           | 042108197 |
| Human Mar. 2006(+)  | 078027146 | CAGAAAAGAGTTGCATTGCTGGGTCCCCTTGGACCTGCTGCTGCCGGTCCG | 078027195 |

|                     |           |                                                     |           |
|---------------------|-----------|-----------------------------------------------------|-----------|
| Mouse Jul. 2007(+)  | 090280193 | GGCAGGATCTCTGGGGCAGGGAGAGTCCATAAGGAGAAAAGGATGCTTACA | 090280242 |
| Rat Nov. 2004(+)    | 112599868 | GGCAGGATCTTTGGGGCAAGGAGAGTCCATAAGGAGAAAAGGATGCTTACA | 112599917 |
| Rhesus Jan. 2006(+) | 141678856 | GCTGGGGAG-----AATTATAAAGAAGAAAAGGCCATTTTCA          | 141678891 |
| Horse Jan. 2007(+)  | 023130592 | GCTAGGAGCTTTGGAGAGGGG--CAAGATAACGAAGAAAAGGATGTTTCA  | 023130639 |
| Dog May 2005(+)     | 054194769 | CCTAGGAGCTTTGCGGAGGGGT-TACTGTATAGAAGAAAAGATGTTTCA   | 054194817 |
| Chicken May 2006(+) | 042108198 | GCCAGGGAACAAAGAG-----GTAAAGGGGAGAGGGAA-----G        | 042108231 |
| Human Mar. 2006(+)  | 078027196 | GCTGGGAAG-----AGTTATAAAGAAGAAAAGGACATTTTCA          | 078027231 |

|                     |           |                                                             |           |
|---------------------|-----------|-------------------------------------------------------------|-----------|
| Mouse Jul. 2007(+)  | 090280243 | AGCTGGGCTCCCCTGGAAAAGTGTAGGATGACATGTGCTGGTCCACT---          | 090280289 |
| Rat Nov. 2004(+)    | 112599918 | AGCTGGGCTCCCCTGGAAAAGTGTAGGATGG <b>CATGTG</b> TTGGTCCACT--- | 112599964 |
| Rhesus Jan. 2006(+) | 141678892 | AGCTAAGCTCCCCTGGAAAAGTGGTAGGATGGCATGAGCTGGTCCACA---         | 141678938 |
| Horse Jan. 2007(+)  | 023130640 | AGCTGGGCGCTACTGGAAAAGTGGTGGATGG <b>CATGTG</b> CTGGTCCATT--- | 023130686 |
| Dog May 2005(+)     | 054194818 | AGCTGGGCACCCCTGGAAAATGGTTGGATAG <b>CATGTG</b> CTGGTCCACT--- | 054194864 |
| Chicken May 2006(+) | 042108232 | AGCTGGCTGCCCT---AAACCTGAGAGAGCTGTGAGCCACCCTGCTCGG           | 042108277 |
| Human Mar. 2006(+)  | 078027232 | AGCTAAGCTCTCCTGGAACTGGTAGGATGGCTGAGCTGGTCCACA---            | 078027278 |

|                     |           |                                                                             |           |
|---------------------|-----------|-----------------------------------------------------------------------------|-----------|
| Mouse Jul. 2007(+)  | 090280290 | -----GGCCC <b>CAGCTGCCAGATG</b> ATGGGAACAGGGAT <b>CAGCTGT</b>               | 090280328 |
| Rat Nov. 2004(+)    | 112599965 | -----GGCCC <b>CAGCTGCCAGATG</b> ATGGGAACAGGGAT <b>CAGCTGT</b>               | 112600003 |
| Rhesus Jan. 2006(+) | 141678939 | -----GGCCC <b>CAGCTGCCAGATG</b> ATGGGAATGGGAT <b>CAGCTGT</b>                | 141678977 |
| Horse Jan. 2007(+)  | 023130687 | -----GGCCC <b>CAGCTGCCACATG</b> ATGGGATGGGAT <b>CAGCTGT</b>                 | 023130725 |
| Dog May 2005(+)     | 054194865 | -----GGCCC <b>CAGCTGCCAGATG</b> ATGGGATGGGAT <b>CAGCTGT</b>                 | 054194903 |
| Chicken May 2006(+) | 042108278 | CAGGGCAGGAAGGCAC <b>CAGCTGT</b> <b>CAGCTG</b> ATCCAAACAGAGAT <b>CAGCTGT</b> | 042108327 |
| Human Mar. 2006(+)  | 078027279 | -----GGCCC <b>CAGCTGCCAGATG</b> ATGGGAATGGGAT <b>CAGCTGT</b>                | 078027317 |

**Fig. S2. Evolutionarily conserved *Nrnx3*<sup>347E</sup> peak sequence.** (A) DNA sequence of chr12:90280146-90280471 (Mouse Genome, Jul 2007, VISTA). (B) Evolutionary conservation of this sequence among mouse, rat, rhesus, horse, dog, human and chicken. Note that the E-box sequences are highlighted in red.

| (A)                    | Range selected | F value           | p value                       | P value for comparison of Atoh7 <sup>-/-</sup> and other groups |                                                                          |                                                                             | P value for comparison of 2 Neurod1 <sup>Atoh7</sup> groups |                                                     |
|------------------------|----------------|-------------------|-------------------------------|-----------------------------------------------------------------|--------------------------------------------------------------------------|-----------------------------------------------------------------------------|-------------------------------------------------------------|-----------------------------------------------------|
|                        | Log sc td-s    | Across all groups | Differences across all groups | Atoh7 <sup>G/G</sup> vs Atoh7 <sup>+G</sup>                     | Atoh7 <sup>G/G</sup> vs Atoh7 <sup>G/G</sup> :Neurod1 <sup>Atoh7/+</sup> | Atoh7 <sup>G/G</sup> vs Atoh7 <sup>+G</sup> :Neurod1 <sup>Atoh7/Atoh7</sup> | Atoh7 <sup>G/G</sup> :Neurod1 <sup>Atoh7/+</sup>            | Atoh7 <sup>+G</sup> :Neurod1 <sup>Atoh7/Atoh7</sup> |
| ERG wave               |                |                   |                               |                                                                 |                                                                          |                                                                             |                                                             |                                                     |
| a-wave @6ms            | 0 to 3         | 1.7               | 0.2*                          | 0.04*                                                           | 0.28*                                                                    | 0.38                                                                        |                                                             | 0.9                                                 |
| b-wave @110ms          | -3 to 3        | 3.9               | 0.032*                        | 0.008*                                                          | 0.035*                                                                   | 0.61                                                                        |                                                             | 0.18                                                |
| b-wave, peak to trough | -3 to 3        | 4.66              | 0.019*                        | 0.004*                                                          | 0.034*                                                                   | 0.55                                                                        |                                                             | 0.18                                                |
| pSTR @ 110 ms          | -5.9 to -3     | 4.43              | 0.022*                        | 0.004*                                                          | 0.033*                                                                   | 0.36                                                                        |                                                             | 0.28                                                |
| nSTR @ 200 ms          | -6.2 to -3     | 6.2               | 0.007*                        | 0.001*                                                          | 0.375                                                                    | 0.051*                                                                      |                                                             | 0.25                                                |

| (B)                    |            |  |  | P-value for Atoh7 <sup>+G</sup> vs Atoh7 <sup>G/G</sup> :Neurod1 <sup>Atoh7/+</sup> | P value for Atoh7 <sup>+G</sup> vs Atoh7 <sup>+G</sup> :Neurod1 <sup>Atoh7/Atoh7</sup> |
|------------------------|------------|--|--|-------------------------------------------------------------------------------------|----------------------------------------------------------------------------------------|
| a-wave @6ms            | 0 to 3     |  |  | 0.32                                                                                | 0.35                                                                                   |
| b-wave @110ms          | -3 to 3    |  |  | 0.6                                                                                 | 0.06 <sup>+</sup>                                                                      |
| b-wave, peak to trough | -3 to 3    |  |  | 0.41                                                                                | 0.04*                                                                                  |
| pSTR @ 110 ms          | -5.9 to -3 |  |  | 0.418                                                                               | 0.074 <sup>+</sup>                                                                     |
| nSTR @ 200 ms          | -6.2 to -3 |  |  | 0.013*                                                                              | 0.19                                                                                   |

\* significant at p<.05 or better

<sup>+</sup> nearly significant at P<.05
